# Supplementary material for: Monolithic Zirconia: An Update to Current Knowledge. Optical Properties, Wear, and Clinical Performance
Source: PubMed Central journal article supplement (PMC6784470; doi:10.3390/dj7030090), 2019-09-02
Supplement: dentistry-07-00090-s001.pdf [file dentistry-07-00090-s001.pdf]

# Supplementary Materials: Monolithic Zirconia: An Update to Current Knowledge. Optical Properties, Wear, and Clinical Performance

Eleana Kontonasaki, Athanasios Rigos, Charithea Ilia and Thomas Istantos

**Table S1.** Studies investigating optical properties of monolithic zirconia specimens/crowns. Studies are presented in ascending chronological order.

| Aut hors.                    | Zirconia system                   | Test Method                                                    | Sample thickness                    | Results                                                                                                                                                                                                                                                                                       |                                   |
|------------------------------|-----------------------------------|----------------------------------------------------------------|-------------------------------------|-----------------------------------------------------------------------------------------------------------------------------------------------------------------------------------------------------------------------------------------------------------------------------------------------|-----------------------------------|
| Kanchanasita et al 2014 [66] | -ZENO Translucent                 | CR measured with a spectrophotometer.                          | 0.3, 0.6, 0.9, 1.2 and 1.5 mm       | inCoris Lava Lava Plus Cercon Base Zeno Zr ZENO                                                                                                                                                                                                                                               |                                   |
|                              | -Lava Plus High Translucency      |                                                                |                                     |                                                                                                                                                                                                                                                                                               |                                   |
|                              | -inCoris TZI                      |                                                                |                                     |                                                                                                                                                                                                                                                                                               | 0.3 0.7 0.68 0.69 0.76 0.75 0.76  |
|                              | -Cercon Base                      |                                                                |                                     |                                                                                                                                                                                                                                                                                               | 0.6 0.75 0.76 0.79 0.84 0.86 0.83 |
|                              | -Zeno Zr                          |                                                                |                                     |                                                                                                                                                                                                                                                                                               | 0.9 0.81 0.83 0.85 0.91 0.93 0.9  |
| -Lava                        | 1.2 0.85 0.88 0.91 0.97 0.97 0.96 |                                                                |                                     |                                                                                                                                                                                                                                                                                               |                                   |
|                              |                                   |                                                                | 1.5 0.88 0.92 0.93 0.99 0.98 0.98   |                                                                                                                                                                                                                                                                                               |                                   |
| Matsuzaki et al 2015 [46]    | -Zpex:Zpex-yellow=100:0           | L*, a*, b* values and TP measured with a colorimeter           | 1.5mm                               | Arithmetic values cannot be extrapolated from the graphs provided in the article. The TP values of the monolithic specimens were significantly greater in the order of Zpex100>Zpex70>Zpex50>TZ3YB.                                                                                           |                                   |
|                              | -Zpex:Zpex-Yellow=70:30           |                                                                |                                     |                                                                                                                                                                                                                                                                                               |                                   |
|                              | -Zpex:Zpex-Yellow=50:50           |                                                                |                                     |                                                                                                                                                                                                                                                                                               |                                   |
|                              | -TZ-3YB-E (opaque)                |                                                                |                                     |                                                                                                                                                                                                                                                                                               |                                   |
| Sulaiman et al 2015[63]      | PSZ:                              | TP, and CR values measured with a reflection spectrophotometer | 0.5, 0.7, 1.0, 1.2, 1.5, and 2.0 mm | Arithmetic values cannot be extrapolated from the data provided in the article. TP ranking from least to most translucent: BRX = PRT = ICE < ZEN < KAT < PRTA. CR ranking from least to most translucent: BRX < ICE = PRT = ZEN < KAT < PRTA. Both values were brand and thickness dependent. |                                   |
|                              | -Prettau (PRT) Prettau            |                                                                |                                     |                                                                                                                                                                                                                                                                                               |                                   |
|                              | -Bruxzir (BRX) Anterior           |                                                                |                                     |                                                                                                                                                                                                                                                                                               |                                   |
|                              | -Zenostar (PRTA)                  |                                                                |                                     |                                                                                                                                                                                                                                                                                               |                                   |
|                              | (ZEN) PSZ (Core):                 |                                                                |                                     |                                                                                                                                                                                                                                                                                               |                                   |
| -Katana HT ICE Zircon (KAT)  |                                   |                                                                |                                     |                                                                                                                                                                                                                                                                                               |                                   |

|                                |                                                                                                                                                                                                                                                      |                                                                              |                                                |                                                                                                                                                                                                                                                                                        |                                                                                                                                             |
|--------------------------------|------------------------------------------------------------------------------------------------------------------------------------------------------------------------------------------------------------------------------------------------------|------------------------------------------------------------------------------|------------------------------------------------|----------------------------------------------------------------------------------------------------------------------------------------------------------------------------------------------------------------------------------------------------------------------------------------|---------------------------------------------------------------------------------------------------------------------------------------------|
| <b>Harada et al 2016[57]</b>   | -Pretau Anterior<br>-BruxZir<br>-Katana HAT<br>-Katana ST<br>-Katana UT                                                                                                                                                                              | Tt% measured by 0.5 and 1mm spectrophotometer at 555 nm wavelength           |                                                | <u>0.5 mm group:</u><br>Prettau Anterior→31.88<br>BruxZir→28.82<br>Katana HT→28.49<br>Katana ST→31.67<br>Katana UT→33.73<br>E-max CAD LT→40.32                                                                                                                                         | <u>1 mm group</u><br>Prettau Anterior→22.58<br>BruxZir→20.13<br>Katana HT→20.18<br>Katana ST→21.86<br>Katana UT→23.37<br>E-max CAD LT→27.05 |
| <b>Kim et al 2016 [60]</b>     | -BruxZir                                                                                                                                                                                                                                             | Color difference $\Delta E_{00}$ and TP measured with a spectrophotometer    | subgroups 0-10 with thickness from 2mm, to 1mm | Number of coloring liquid application (Group 1-5) and amount of thickness reduction in mm (Subgroup 1-10). TP values from the thicker to the thinnest subgroup:<br>Group I: 2.76 -5.21<br>Group II:1.8: 2.72-5.04<br>Group III: 2.43-5.20<br>Group IV: 2.27-5.34<br>Group V: 2.29-5.19 |                                                                                                                                             |
| <b>Kim et al 2016 [61]</b>     | Monolithic zirconia:<br>-Rainbow Shade A05<br>-Rainbow Shade A2<br>-Rainbow High Shine A0<br>-Rainbow High Shine A1<br>-Rainbow High Shine A2<br>-Katana ML A Light<br>-Katana ML A Dark<br>-ST pre-shade A1<br>-ST pre-shade A2<br>-ST pre-shade A3 | L*, a*, b* values and TP measured with a diffuse-reflected spectrophotometer | 1.5mm                                          |                                                                                                                                                                                                                                                                                        | TP<br>1.53<br>0.61<br>1.66<br>1.68<br>2.31<br>8.04<br>7.88<br>0.79<br>0.72<br>0.56                                                          |
| <b>Malkondu et al 2016[48]</b> | -Ceramill Zolid<br>Types of cement used:                                                                                                                                                                                                             | L*, a* and b* and TP measured with a spectrophotometer                       | 0.6 and 1mm                                    | $\Delta L(0.6mm)$ : RC=-4.77, RGI=-3.46, GI=-4.57<br>$\Delta L(1.0mm)$ : RC=-1.86, RGI=-1.81, GI=-2.8<br>$\Delta a(0.6mm)$ : RC=-0.78, RGI=-0.28, GI=0.38                                                                                                                              |                                                                                                                                             |

|                                 |                                                                                                                                           |                                                 |                                                                                                                                                     |                                                                                                                                                           |
|---------------------------------|-------------------------------------------------------------------------------------------------------------------------------------------|-------------------------------------------------|-----------------------------------------------------------------------------------------------------------------------------------------------------|-----------------------------------------------------------------------------------------------------------------------------------------------------------|
|                                 | -conventional glass ionomer (GI) cement                                                                                                   |                                                 | $\Delta a(1.0\text{mm}): RC = -1.41, RGI = -0.89, GI = -0.39$                                                                                       |                                                                                                                                                           |
|                                 | -resin-modified glass ionomer (RGI) cement                                                                                                |                                                 | $\Delta b(0.6\text{mm}): RC = -2.75, RGI = 0.42, GI = -0.69$                                                                                        |                                                                                                                                                           |
|                                 | -resin cement (RC)                                                                                                                        |                                                 | $\Delta b(1.0\text{mm}): RC = -3.78, RGI = -0.74, GI = -1.96$                                                                                       |                                                                                                                                                           |
|                                 |                                                                                                                                           |                                                 | $\Delta E(0.6\text{mm}): RC = 5.64, RGI = 3.53, GI = 4.7$                                                                                           |                                                                                                                                                           |
|                                 |                                                                                                                                           |                                                 | $\Delta E(1.0\text{mm}): RC = 5.06, RGI = 2.23, GI = 3.48$                                                                                          |                                                                                                                                                           |
|                                 |                                                                                                                                           |                                                 | TP(0.6mm): RC(from 17.60 to 14.89), RGI(from 17.14 to 14.05), GI(from 17.28 to 9.85)                                                                |                                                                                                                                                           |
|                                 |                                                                                                                                           |                                                 | TP(1.0mm): RC(from 12.44 to 9.87), RGI(from 12.84 to 10.56), GI(from 12.95 to 7.66)                                                                 |                                                                                                                                                           |
| <b>Tunsel et al 2016 [29]</b>   | -Prettau (MZ)<br>-Colored ICE Zirkonia (CZ)<br>-Non-colored ICE Zirkonia (Z)                                                              | CR measured with a 0.5mm spectrophotometer      | CR<br>Z 0.7482<br>CZ 0.7864<br>MZ 0.7964                                                                                                            |                                                                                                                                                           |
| <b>Vichi et al 2016[45]</b>     | Traditional zirconia:<br>-IPS e.max ZIR-Cad<br>-inCoris ZI<br>-In-Ceram YZ<br>Increased Translucency:<br>-inCoris TZI<br>- In-Ceram YZ HT | CR and TP measured with a 1mm spectrophotometer | CR:<br>IPS e.max ZIR-Cad = 0.75±0.01<br>inCoris ZI = 0.74±0.02<br>In-Ceram YZ = 0.70±0.01<br>inCoris TZI = 0.68±0.01,<br>In-Ceram YZ HT = 0.68±0.01 | TP:<br>IPS e.max ZIR-Cad = 11.48±0.53<br>inCoris ZI = 012.64± 0.93<br>In-Ceram YZ = 13.78±0.28<br>inCoris TZI = 14.05±0.31,<br>In-Ceram YZ HT =14.44±0.34 |
| <b>Carrabba et al 2017 [32]</b> | -Aadva ST<br>-Aadva EI<br>-Aadva NT<br>-Katana UTML                                                                                       | CR measured with a 1mm spectrophotometer        | CR<br>ST 0.74<br>EI 0.69<br>NT 0.65<br>LD 0.56                                                                                                      |                                                                                                                                                           |
| <b>Elsaka et al 2017 [7]</b>    | -Ceramill Zolid FX Multilayer (CZF)<br>-Prettau Anterior (PA)<br>-Wieland Zenostar (ZT)                                                   | TP and CR measured with a 1mm spectrophotometer | TP<br>CZF 19.41<br>PA 16.83<br>ZT 15.88                                                                                                             | CR<br>0.56<br>0.74<br>0.76                                                                                                                                |

|                                             |                                                     |                                                                                                 |                                            |                                                                                                                                                                                                                                                                                                                                                                                                                                                                                                                                                      |
|---------------------------------------------|-----------------------------------------------------|-------------------------------------------------------------------------------------------------|--------------------------------------------|------------------------------------------------------------------------------------------------------------------------------------------------------------------------------------------------------------------------------------------------------------------------------------------------------------------------------------------------------------------------------------------------------------------------------------------------------------------------------------------------------------------------------------------------------|
| <b>Kim et al 2017 [28]</b>                  | Rainbow Shade A2                                    | L*, a* and b* and $\Delta E_{00}$ measured with a spectrophotometer                             | 0.5, 1 and 1.5mm                           | Comparison of color coordinates between conventional and microwave sintering.<br>Conventional : 0.5 mm: L*=72.15, a* = -1.81, b*=14.81, TP=11.52<br>1.0 mm: L* = 69.44, a* = -1.31, b* = 15.41, TP = 7.87<br>1.5 mm: L* = 68.90, a* = -1.20, b* = 14.33, TP = 5.31<br>Microwave: 0.5 mm: L*=72.60, a* = -1.65, b* = 15.35, TP = 11.43<br>1.0 mm: L* = 70.36, a* = -0.99, b* = 16.10, TP = 7.50<br>1.5 mm: L* = 68.57, a* = -0.93, b* = 11.95, TP = 5.28<br>$\Delta E_{00}$ values between conventional and microwave sintering <1 at all thicknesses |
| <b>Shamseddine, &amp; Majzoub 2017 [56]</b> | -Katana UTML                                        | TP measured from photographs under standardized shooting conditions                             | 0.4, 0.6, 0.8 and 1mm                      | TP of different layers (DEL=Dentin, ENL=Enamel, FTL,STL=intermediate layers)<br>DEL<br>FTL<br>0.4 17.50 (0.86) 0.4 16.18 (0.98)<br>0.6 14.81 (0.83) 0.6 13.88 (0.98)<br>0.8 13.69 (1.80) 0.8 11.78 (2.37)<br>1 12.92 (0.64) 1 11.62 (1.33)<br>STL<br>ENL<br>0.4 15.39 (0.47) 0.4 15.28 (1.31)<br>0.6 13.10 (2.33) 0.6 13.49 (1.74)<br>0.8 12.30 (2.97) 0.8 12.32 (2.63)<br>1 11.46 (0.77) 1 12.65 (0.97)                                                                                                                                             |
| <b>Baldissara et al 2018 [47]</b>           | -Katana STML (UT)<br>-Katana UTML(ST)               | Tt measured using a photoradiometer in a dark chamber and CR measured with a spectrophotometer. | Crowns of 1 and 1.5mm                      | 1.0mm: Tt test ( $lx \cdot 10^3$ ):<br>UT = $75 \pm 0.5$<br>ST = $68.4 \pm 0.5$<br>1.5mm: UT = $65.2 \pm 1.6$<br>L-DIS = $35.2 \pm 0.9$<br>CR analysis:<br>UT = $0.76 \pm 0.04$<br>ST = $0.79 \pm 0.03$<br>UT = $0.81 \pm 0.03$<br>L-DIS = $0.84 \pm 0.02$                                                                                                                                                                                                                                                                                           |
| <b>Camposilvan et al 2018 [58]</b>          | -Aadva ST<br>-Aadva EI<br>-Aadva NT<br>-Katana UTML | Total transmittance (Tt%) and Contrast Ratio (CR) measured by a spectrophotometer               | Full-contour molar-crowns 1.5mm, disks 1mm | CR<br>Tt%<br>ST 0.74 36.9 $\pm$ 0.15<br>EI 0.70 38.4 $\pm$ 0.07<br>NT 0.62 43.4 $\pm$ 0.13                                                                                                                                                                                                                                                                                                                                                                                                                                                           |

|                                   |                                   |                                      | ML                                | 0.69              | 36.0±0.07     |                                 |
|-----------------------------------|-----------------------------------|--------------------------------------|-----------------------------------|-------------------|---------------|---------------------------------|
| <b>Inokoshi et al 2018 [64]</b>   | Katana ST                         | TP measured with a 0.5mm             |                                   |                   |               | TP                              |
|                                   | Katana UT                         | colorimeter                          | Katana ST                         |                   |               | 34.2±0.7                        |
|                                   | Katana HT                         |                                      | Katana UT                         |                   |               | 36.7±1.8                        |
|                                   | Zpex Smile                        |                                      | Katana HT                         |                   |               | 29.5±0.9                        |
|                                   |                                   |                                      | Zpex Smile                        |                   |               |                                 |
| <b>Kwon et al 2018 [62]</b>       | -5Y-ZP (Katana UTML)              | L*a*b* values were 1mm               |                                   |                   |               | TP                              |
|                                   | -3Y-TZP (Katana HT)               | measured with a                      | Katana UTML                       |                   |               | 8.30                            |
|                                   | -lithium disilicate (e.max CAD).  | spectrophotometer and                | Katana HT                         |                   |               | 6.96                            |
|                                   |                                   | $\Delta E_{00}$ , TP were calculated | e.max CAD                         |                   |               | 9.28                            |
| <b>Nassary et al 2018 [68]</b>    | Ceramill Zolid FX CopraSmile      | Total transmittance (Tt%) 1mm        |                                   |                   |               | Translucency-t <sub>c</sub> (%) |
|                                   | DD cubeX2                         | was measured by a                    |                                   |                   |               |                                 |
|                                   | NOVAZIR MaxT                      | spectrophotometer                    | Ceramill Zolid FX                 |                   |               | 38.3±0.3                        |
|                                   | pritti multidisc ZrO <sub>2</sub> |                                      | CopraSmile                        |                   |               | 37.1±0.3                        |
|                                   | StarCeram Z-Smile                 |                                      | DD cubeX2                         |                   |               | 37.3±0.3                        |
|                                   | IPS e.max Press (control)         |                                      | NOVAZIR MaxT                      |                   |               | 33.1±0.5                        |
|                                   |                                   |                                      | pritti multidisc ZrO <sub>2</sub> |                   |               | 37.6±0.5                        |
|                                   |                                   |                                      | StarCeram Z-Smile                 |                   |               | 33.6±0.2                        |
|                                   |                                   | IPS e.max Press (control)            |                                   |                   | 40.4±0.4      |                                 |
| <b>Liebermann et al 2018 [17]</b> | -Emax.CAD_HT (control)            | Total transmittance (Tt%) in         | -Bruxzir (0.5/1 mm)               |                   | Visible light | Blue light                      |
|                                   | -Bruxzir                          | two different wavelength             | -Cercon HT (0.4/1 mm)             | E.max_HT 1 mm     | 44.72±0.005   | 23.50±0.002                     |
|                                   | -Cercon HT                        | spectra (blue and visible            | -Lava Frame (0.3/1 mm)            | Lava Frame 0.3 mm | 40.70±0.004   | 16.00±0.004                     |
|                                   | -Lava Frame                       | light) and Contrast Ratio            | -Lava Plus (0.3/1 mm)             | Prettau 0.5 mm    | 33.54±0.005   | 12.50±0.003                     |
|                                   | -Lava Plus                        | (CR) measured by a                   | -Prettau (0.5/1 mm)               | Bruxzir 0.5 mm    | 39.59±0.008   | 18.20±0.007                     |
|                                   | -Prettau                          | spectrophotometer                    | -Zenostar (0.4/1 mm)              | Cercon_HT 0.4 mm  | 38.52±0.006   | 15.28±0.004                     |
|                                   | -Zenostar                         |                                      | - Emax.CAD_HT (1mm)               | Zenostar 0.4 mm   | 33.95±0.005   | 12.27±0.002                     |
|                                   |                                   |                                      |                                   | Lava Plus 0.3 mm  | 41.15±0.006   | 16.00±0.003                     |

|                                 |                                                                                                                       |                                                                                                                                                                                                                             |          |                                                                                                                                   |             |                 |              |
|---------------------------------|-----------------------------------------------------------------------------------------------------------------------|-----------------------------------------------------------------------------------------------------------------------------------------------------------------------------------------------------------------------------|----------|-----------------------------------------------------------------------------------------------------------------------------------|-------------|-----------------|--------------|
|                                 |                                                                                                                       |                                                                                                                                                                                                                             |          | Bruxzir 1 mm                                                                                                                      | 31.61±0.008 | 12.00±0.006     |              |
|                                 |                                                                                                                       |                                                                                                                                                                                                                             |          | Lava Frame 1 mm                                                                                                                   | 26.26±0.002 | 7.54±0.001      |              |
|                                 |                                                                                                                       |                                                                                                                                                                                                                             |          | Lava Plus 1 mm                                                                                                                    | 28.09±0.003 | 8.44±0.002      |              |
|                                 |                                                                                                                       |                                                                                                                                                                                                                             |          | Prettau 1 mm                                                                                                                      | 25.94±0.014 | 8.11±0.008      |              |
|                                 |                                                                                                                       |                                                                                                                                                                                                                             |          | Zenostar 1 mm                                                                                                                     | 19.64±0.003 | 4.80±0.001      |              |
|                                 |                                                                                                                       |                                                                                                                                                                                                                             |          | Cercon_HT 1 mm                                                                                                                    | 25.30±0.007 | 7.67±0.003      |              |
| <b>Kulkarni et al 2018 [54]</b> | -VITA VMK 95 (feldspathic porcelain)<br>-IPS e.max CAD (lithium disilicate)<br>-Dentsply Cercon (monolithic zirconia) | Specular reflection gloss measured by a gloss meter. L*a*b* values were measured with a spectrophotometer. The TP was calculated. The specimens were submitted to gastric acid treatment and toothbrush abrasion treatment. | 1mm      |                                                                                                                                   |             | Gloss (degrees) |              |
|                                 |                                                                                                                       |                                                                                                                                                                                                                             |          |                                                                                                                                   | IPS e.max   | Porcelain       | Zirconia     |
|                                 |                                                                                                                       |                                                                                                                                                                                                                             |          | Control                                                                                                                           | 22.81±13.50 | 69.54±11.63     | 100.13±12.65 |
|                                 |                                                                                                                       |                                                                                                                                                                                                                             |          | Acid only                                                                                                                         | 15.08±6.23  | 51.33±9.36      | 78.31±31.34  |
|                                 |                                                                                                                       |                                                                                                                                                                                                                             |          | Toothbrush only                                                                                                                   | 16.05±5.45  | 55.30±13.99     | 95.39±7.74   |
|                                 |                                                                                                                       |                                                                                                                                                                                                                             |          | Acid + brush                                                                                                                      | 10.99±5.93  | 60.60±6.98      | 95.68±18.61  |
| <b>Huh et al 2018 [59]</b>      | -Zenostar T0<br>-Zenostar sun<br>-Zenostar sun chroma                                                                 | The brightness L* was measured by a dental chroma meter<br><br>The surfaces were evaluated after receiving grinding, smoothing + prepolishing and gloss polishing.                                                          | 1mm, 3mm | -Arithmetic values cannot be extrapolated from the figures provided in the article<br>-polishing led to a reduction in brightness |             |                 |              |
| <b>Sen et al 2018 [24]</b>      | -Vita YZ HT White<br>-Vita YZ HTColor<br>-Prettau Zirkonzahn<br>-Prettau Anterior Zirkonzahn                          | Specimens received liquid coloring.<br><br>Specimens were assigned to groups depending on final sintering temperature                                                                                                       | 1mm      |                                                                                                                                   |             | TP              |              |
|                                 |                                                                                                                       |                                                                                                                                                                                                                             |          |                                                                                                                                   | colored     | Non-colored     |              |
|                                 |                                                                                                                       |                                                                                                                                                                                                                             |          | Vita YZ HT White                                                                                                                  |             |                 |              |
|                                 |                                                                                                                       |                                                                                                                                                                                                                             |          | -1350°C                                                                                                                           | 15.28±0.43  | 16.42±0.62      |              |
|                                 |                                                                                                                       |                                                                                                                                                                                                                             |          | -1450°C                                                                                                                           | 17.14±0.71  | 17.49±0.38      |              |



dentifric for time equivalent  
of 17 years.

**Table S2:** In-vitro studies investigating the wear properties of monolithic zirconia. Studies are presented in ascending chronological order.

| A<br>ut<br>h<br>or<br>s.      | Antagonist                                                                               | Monolithic zirconia system<br>/ Other materials                             | Zirconia surface treatment                                     | Test method                                                                                              | Results (antagonist wear)                                                                                                            |
|-------------------------------|------------------------------------------------------------------------------------------|-----------------------------------------------------------------------------|----------------------------------------------------------------|----------------------------------------------------------------------------------------------------------|--------------------------------------------------------------------------------------------------------------------------------------|
| Albashaireh<br>et al.2010 [1] | -Lithium disilicate<br>-Leucite glass<br>-Fluorapatite glass<br>-Nano-fluorapatite glass | IPS e.max ZirCAD                                                            | Polished                                                       | Chewing simulator,<br>300,000 cycles, 49 N,<br>1500 cycles between 5°-<br>55°C, water                    | Monolithic zirconia < other groups                                                                                                   |
| Jung et al 2010<br>[102]      | Enamel                                                                                   | Prettau<br><br>Veneering glass-ceramic                                      | Polished: SiC 1,200 grit<br>Glazed: glaze system               | Chewing simulator,<br>240,000 cycles, 49 N,<br>0.8Hz                                                     | Polished zirconia showed the lowest wear                                                                                             |
| Preis et<br>al.2011 [109]     | -Enamel<br>-Steatite                                                                     | -Zeno Zr Bridge<br><br>veneering glass-ceramic,<br>other zirconia materials | Polished: SiC 500, water-cooling                               | pin-on-block design<br>wear tester, 50 N, 1.2 ×<br>10 <sup>5</sup> cycles, 1.6 Hz, 600<br>cycles, 5–55°C | Antagonist wear against of monolithic zirconia was<br>found to be comparable with, and even lower than that<br>of veneering ceramics |
| Beuer et al<br>2012 [94]      | Stainless steel                                                                          | Zirluna<br><br>Veneering glass-ceramic                                      | -Polished: Polishing kit for ceramics<br>-Glazed: glaze system | Chewing simulator,<br>1.2×10 <sup>5</sup> cycles, 50 N, 1.6<br>Hz, 320/120,000 cycles,<br>5–55°C         | Polished zirconia showed the highest wear and glazed<br>the less.                                                                    |



|                               |                                 |                                                                                  |                                                                                                                                                                                                   |                                                                                                |                                                                                                                                |
|-------------------------------|---------------------------------|----------------------------------------------------------------------------------|---------------------------------------------------------------------------------------------------------------------------------------------------------------------------------------------------|------------------------------------------------------------------------------------------------|--------------------------------------------------------------------------------------------------------------------------------|
| <b>Kim et al.2012 [103]</b>   | -Enamel<br>-Feldspathic ceramic | -Prettau<br>-Lava<br>-Rainbow<br><br>Lithium disilicate, veneering glass-ceramic | Polished: SiC 1200 grit                                                                                                                                                                           | Chewing simulator, 49 N, 5–55°C                                                                | Zirconia showed the lowest wear.<br>Enamel wear was greater than that of feldspathic ceramic wear                              |
| <b>Mitov et al 2012 [77]</b>  | Enamel                          | Everest ZH<br><br>Veneering glass-ceramic                                        | -Polished: commercial metallographic preparation system<br>-Ground: red and green diamond bars<br>-Glazed: 100µm Al <sub>2</sub> O <sub>3</sub> , commercial glazing agent                        | Chewing simulator, 1.2×10 <sup>5</sup> cycles, 50 N, 1.6 Hz, water                             | Polished zirconia showed the lowest wear                                                                                       |
| <b>Preis et al 2012 [104]</b> | Enamel<br>Steatite              | Cercon<br>Lava                                                                   | -Polished: polishing kit for ceramics<br>-Polished and ground: diamond bur<br>-Polished, ground and repolished                                                                                    | pin-on-block wear tester, 1.2×10 <sup>5</sup> cycles, 50 N, 1.2 Hz, 600 cycles, 5/55 °C, water | Polished, ground and repolished zirconia showed no wear                                                                        |
| <b>Preis et al 2012 [83]</b>  | Steatite                        | Cercon<br><br>Veneering glass- ceramic                                           | -As sintered<br>-Glazed: glazed system<br>-Sandblasted and glazed: 100 mm, Al <sub>2</sub> O <sub>3</sub> , 2.5 bar<br>-Polished and ground<br>-Polished, ground and repolished: polishing system | Chewing simulator, 1.2×10 <sup>5</sup> cycles, 50 N, 1.6 Hz, 600 cycles, 5–55°C                | Monolithic zirconia less wear compared to veneered zirconia<br>Polished, ground and repolished zirconia showed the lowest wear |



|                                       |                          |                                                                                  |                                                                                                                                                    |                                                                     |                                                                                                                                          |
|---------------------------------------|--------------------------|----------------------------------------------------------------------------------|----------------------------------------------------------------------------------------------------------------------------------------------------|---------------------------------------------------------------------|------------------------------------------------------------------------------------------------------------------------------------------|
| <b>Sabrah et al 2013 [81]</b>         | Synthetic hydroxyapatite | Diazir                                                                           | -As machined:<br>Glazed: zirconia glazing system<br>-Ground: fine diamond bur, cooling water<br>-Polished: polishing kit                           | pin-on-disk wear tester, 25,000 cycles, 1.2 Hz, 3-kg load, water    | Glazed zirconia showed the highest wear                                                                                                  |
| <b>Stawarczyk et al 2013 [95]</b>     | Enamel                   | Zeno Zr Bridge transluzent<br><br>Monolithic alloy, veneered zirconia            | -Glazed: with ceramic or spray<br>-Mechanically polished: up to 3 mm using diamond suspensions<br>-Manually polished: hair brush and diamond paste | chewing simulator, 49Na, 1.67Hz, 1.2×10 <sup>5</sup> cycles, 5–55°C | Polished zirconia showed the lowest wear, similar to monolithic alloy                                                                    |
| <b>Amer et al 2014 [93]</b>           | Enamel                   | Crystal Zirconia<br><br>Lithium disilicate, veneering glass-ceramic              | -Grinded: diamond rotary cutting disk under water cooling<br>-Polished: SiC 80 and 600 grit, water cooling<br>-Glazed: glaze paste                 | Wear machine, 70N, 1.0 Hz, 50 000 cycles                            | Polished zirconia showed the lowest wear                                                                                                 |
| <b>Luangruangrong et al 2014 [80]</b> | Glass ceramic            | Diazir<br><br>Leucite reinforced glass-ceramic, lithium disilicate glass ceramic | -Glazed: glazing system<br>-As machined                                                                                                            | pin-on-disk wear tester, 5,000 cycles, 1.2 Hz, 3 kg load            | Glazed zirconia showed the highest wear                                                                                                  |
| <b>Park et al 2014 [97]</b>           | Enamel                   | Prettau<br>Zeno<br>ZirBlank<br>BruxZir<br><br>Veneering glass-ceramic            | -Polished: no details<br>-Glazed: glaze system                                                                                                     | Chewing simulator, 240,000 cycles, 49 N, 0.8Hz, water               | Monolithic zirconia showed higher wear compared to the glass-ceramic<br>Glazed zirconia showed higher wear compared to polished zirconia |

|                                         |          |                                                                                                |                                                                  |                                                                                         |                                                                                                                                                                                                                                  |
|-----------------------------------------|----------|------------------------------------------------------------------------------------------------|------------------------------------------------------------------|-----------------------------------------------------------------------------------------|----------------------------------------------------------------------------------------------------------------------------------------------------------------------------------------------------------------------------------|
| <b>Sripetchdano and et al 2014 [86]</b> | -Enamel  | -Lava<br><br>Lithium disilicate, composite resin                                               | -Polished: SiC 400, 800, and 1200 grit running water, 2 min      | Pin-on-disk wear tester, 25 N at 20 cycles per minute, 4800 cycles                      | Depth of enamel wear: monolithic zirconia and composite resin was significantly lower than that caused by glass ceramic and enamel.                                                                                              |
| <b>Preis et al 2015 [76]</b>            | Steatite | Cercon ht<br>Cercon base                                                                       | -Ground: diamond bur<br>Polished: 3-step intraoral polishing set | Chewing simulator, 25 N, 120,000 cycles, 20 mm/s, water                                 | Wear was shown to have minor influence on roughness and no influence on phase transformation                                                                                                                                     |
| <b>Choi et al 2016 [105]</b>            | Enamel   | Zirtooth Fulluster<br><br>Leucite glass-ceramic, lithium disilicate, stainless steel           | -As -received                                                    | Chewing simulator, 50 N, 100,000 cycles, 0.8Hz, 5°C-55°C ,water                         | Stainless steel and monolithic zirconia caused less primary tooth wear than leucite glass-ceramic and lithium disilicate glass-ceramic                                                                                           |
| <b>Rupawala et al 2016 [106]</b>        | Enamel   | Lava<br><br>Lithium disilicate<br>Veneering glass-ceramic                                      | -Polished: polishing paste for zirconia<br>-Glazed: glaze liquid | two-body wear tester, 49N, artificial saliva, 10.000 cycles                             | Polished zirconia showed the least amount of enamel wear compared to glazed monolithic zirconia. Lithium disilicate and glazed monolithic zirconia showed the highest enamel wear.                                               |
| <b>Stawarczyk et al 2016[107]</b>       | Enamel   | Zenostar<br>DD BioZX <sup>2</sup><br>Ceramill Zolid<br>InCorisTZI<br><br>Conventional zirconia | -Polished: SiC grits 600-1000 water cooling                      | Chewing simulator, 1.2x10 <sup>5</sup> cycles, 50 N, 1.2 Hz, 600 cycles, 5/55 °C, water | Veneered conventional zirconia showed significantly higher material and antagonist wear than all monolithic polished and glazed groups. Glazed zirconia specimens showed higher material and antagonist wear than polished ones. |
| <b>Kaizer et al 2017 [108]</b>          | Steatite | inCoris TZI                                                                                    | -Polished: 1 µm diamond suspension                               | Chewing simulator, 198 N, 1.2 million cycles, 1.6 Hz, water, 5 - 55 °C                  | Long-term sintering showed less wear compared to speed and super speed sintering. Cracks and phase transformation due to the wear process, indicate the susceptibility of zirconia ceramics to sliding contact fracture          |

|                                     |                                                             |                                                                                                     |                                                                                                                                                                                                                                                                                                                                                                                                           |                                                                                                            |                                                                                                                                                                                                                                                         |
|-------------------------------------|-------------------------------------------------------------|-----------------------------------------------------------------------------------------------------|-----------------------------------------------------------------------------------------------------------------------------------------------------------------------------------------------------------------------------------------------------------------------------------------------------------------------------------------------------------------------------------------------------------|------------------------------------------------------------------------------------------------------------|---------------------------------------------------------------------------------------------------------------------------------------------------------------------------------------------------------------------------------------------------------|
| <b>Gundugollu et al 2018 [98]</b>   | Maxillary first premolars                                   | -DentGallop<br>-DentGallop veneered with glass ceramic                                              | -Unpolished and unglazed monolithic zirconia<br>-Polished and unglazed monolithic zirconia<br>-Polished and glazed monolithic zirconia<br>-Unpolished and unglazed layered zirconia<br>-Polished and unglazed layered zirconia<br>-Polished and glazed layered zirconia<br><br>Iris ceramic finishing diamond points + Shofu polishing discs (coarse 55 µm, medium 40 µm, fine 24 µm, and superfine 8 µm) | Chewing simulator, 50 N, 250.000 cycles, 0.17 Hz , artificial saliva at 37°C                               | -Enamel presented more significant tooth wear when opposed to layered zirconia compared to monolithic zirconia.<br><br>-Polished unglazed monolithic zirconia produced less wear to the antagonist compared to polished and glazed monolithic zirconia. |
| <b>Ludovichetti et al 2018 [90]</b> | All tested materials were used as abraders and antagonists. | -IPS e.max CAD<br>-Vita Suprinity<br>-Lava Ultimate<br>-Vita Enamic<br>-Lava Plus<br>-bovine enamel | -Polished with silicon carbide abrasive papers (400-, 600-, 1200-grit papers)                                                                                                                                                                                                                                                                                                                             | ACTA wear machine, 15 N, 200.000 cycles, 1 Hz , distilled water at 37°C                                    | -Zirconia, Lithium disilicate and zirconia-reinforced lithium silicate led to increased wear on the enamel and the materials tested<br><br>-Zirconia did not damage the surface of the materials, apart from the enamel.                                |
| <b>Sarıkaya etl al 2018 [91]</b>    | Steatite                                                    | -Bruxzir<br>-Incoris TZI                                                                            | Glazed                                                                                                                                                                                                                                                                                                                                                                                                    | thermocycling for 10,000 cycles between 5 and 55 °C.<br><br>Chewing simulator, 49 N, 1.250.000 cycles, 1.6 | Incoris TZI presented increased wear compared to Bruxzir.                                                                                                                                                                                               |

|                                    |                                          |                                                                                                                                                                                                                                                                                |                                                                                                                |                                                                       |                                                                                                                                                                                                                                                                                                                                                      |
|------------------------------------|------------------------------------------|--------------------------------------------------------------------------------------------------------------------------------------------------------------------------------------------------------------------------------------------------------------------------------|----------------------------------------------------------------------------------------------------------------|-----------------------------------------------------------------------|------------------------------------------------------------------------------------------------------------------------------------------------------------------------------------------------------------------------------------------------------------------------------------------------------------------------------------------------------|
|                                    |                                          |                                                                                                                                                                                                                                                                                |                                                                                                                | Hz , medium not specified                                             |                                                                                                                                                                                                                                                                                                                                                      |
| <b>Ho et al 2018 [92]</b>          | Tetric EvoCeram (direct resin composite) | Lava Plus (High Translucent Zirconia)<br>IPS e.max Press Low (Translucent Lithium Disilicate)                                                                                                                                                                                  | -Polished with 1200-grit abrasive paper<br>-Coarse, medium and fine diamond-impregnated silicone polishers     | Chewing simulator, 49N, 250.000 cycles, 40 mm/s                       | Lithium disilicate caused higher wear of resin composite compared to monolithic zirconia                                                                                                                                                                                                                                                             |
| <b>D'Arcangelo et al 2018 [85]</b> | Same as the tested material              | -Aurocast8 (type 3 gold alloy)<br>-IPS e.max CAD, IPS e.max Press (lithium disilicate)<br>- Cerabien ZR Press (feldspathic porcelain)<br>- Katana Zirconia ML (monolithic zirconia)<br>-heat-cured composite resins (Ceram.X Universal, Enamel Plus Function, Enamel Plus HRi) | -Silicon-carbide silicon polishers and paper-abrasive cones<br>-Diamond polishing paste with a goat hair brush | Chewing simulator, 49 N, 120.000 cycles, 1.6 Hz, medium not specified | Monolithic zirconia exhibited significantly reduced wear compared to all tested materials.                                                                                                                                                                                                                                                           |
| <b>Habib et al 2019 [87]</b>       | Enamel                                   | Monolithic zirconia (Zolid fx preshade)<br>Lithium disilicate (IPS E.max)<br>Porcelain fused to metal<br>Composite resin (Nano hybrid filtek z250)                                                                                                                             | -Polished or glazed (according to manufacturer's instructions)                                                 | Chewing simulator, 49 N, 240.000 cycles, 0.8 Hz , water, 5 - 55 °C    | -Monolithic zirconia and porcelain fused to metal demonstrated higher resistance to surface roughness compared to lithium disilicate and composite resin<br>-Enamel showed no significant differences when worn against the tested materials<br>-enamel against monolithic zirconia and porcelain fused to metal demonstrated increased height loss. |

|                                   |                          |                                                                                                                                                       |                                                                                                                                                                                                                                                                                                       |                                                                                |                                                                                                         |
|-----------------------------------|--------------------------|-------------------------------------------------------------------------------------------------------------------------------------------------------|-------------------------------------------------------------------------------------------------------------------------------------------------------------------------------------------------------------------------------------------------------------------------------------------------------|--------------------------------------------------------------------------------|---------------------------------------------------------------------------------------------------------|
| <b>Bolaca et al</b><br>2019 [88]  | Enamel of primary molars | -Monolithic zirconia (Zenostar® T)<br>-lithium disilicate glass ceramic (IPS e.max CAD LT)<br>-resin nanoceramic (Lava™ Ultimate CAD/CAM Restorative) | -Polished with abrasive paper polishing disks and brushes                                                                                                                                                                                                                                             | Chewing simulator, 50 N, 100.000 cycles, 1.6 Hz, water, 5 - 55 °C              | Monolithic zirconia led to the lowest antagonist wear compared to the materials tested.                 |
| <b>Kaizer et al</b><br>2019 [101] | Steatite                 | -polished zirconia<br>-polished graded zirconia<br>-as-machined graded zirconia<br>-as-machined glazed zirconia<br>-glass-ceramic (IPS Empress)       | Glass ceramic:<br>Polished 15 µm, 6 µm, 3 µm, and 1 µm diamond impregnated pads<br>Zirconia:<br>-roughened with 240-grit sandpaper before sintering / 1 µm polishing after sintering<br>-3 µm diamond impregnated pad<br>-glazed with Zenostar Glaze<br>-finished with a 3 µm diamond impregnated pad | oral wear simulator 50 N, 450.000 cycles, 1 Hz                                 | Monolithic zirconia presented lower abrasiveness to the antagonist compared to the glass ceramic.       |
| <b>Kaizer et al</b><br>2019 [84]  | Steatite                 | -Lava Plus<br>-human third molars                                                                                                                     | -Polished after sintering<br>-Polished prior to sintering and glass infiltrated<br>-Glass infiltrated and sintered                                                                                                                                                                                    | Chewing simulator, 200 N, 1.25 million cycles, 2 Hz, water at room temperature | Crowns that were polished and glass infiltrated presented reduced wear on the crown and the antagonist. |

**Table S3.** Commercial products listed in the studies included in the review, manufacturers and compositions.

| Brand          | Manufacturer                | Composition (wt%)                           | Source          |
|----------------|-----------------------------|---------------------------------------------|-----------------|
| <b>BruxZir</b> | Glidewell laboratories, USA | 3mol% Y-TZP (No other details can be found) | Reference [145] |

|                               |                                      |                                                                                                                                                                                                                                                                               |                                                                                                                                                                                                                                                       |
|-------------------------------|--------------------------------------|-------------------------------------------------------------------------------------------------------------------------------------------------------------------------------------------------------------------------------------------------------------------------------|-------------------------------------------------------------------------------------------------------------------------------------------------------------------------------------------------------------------------------------------------------|
| <b>Ceramill Zolid</b>         | Amann Girschbach AG, Austria         | 3 mol% Y-TZP: ZrO <sub>2</sub> + HfO <sub>2</sub> + Y <sub>2</sub> O <sub>3</sub> > 99%, Y <sub>2</sub> O <sub>3</sub> : 4.5–5.6%, HfO <sub>2</sub> < 5%, Al <sub>2</sub> O <sub>3</sub> < 0.5%                                                                               | Reference [146]                                                                                                                                                                                                                                       |
| <b>Cercon , Cercon base</b>   | DeguDent GmbH, Germany               | 3 mol% Y-TZP: ZrO <sub>2</sub> (+HfO <sub>2</sub> ) % main component, Y <sub>2</sub> O <sub>3</sub> 5 w%, Al <sub>2</sub> O <sub>3</sub> + SiO <sub>2</sub> 1 %, HfO <sub>2</sub> 2 %                                                                                         | Reference [147]                                                                                                                                                                                                                                       |
| <b>Cercon ht</b>              | DeguDent GmbH, Germany               | 3 mol% Y-TZP: ZrO <sub>2</sub> , Y <sub>2</sub> O <sub>3</sub> 5 %, HfO <sub>2</sub> < 3 %, Al <sub>2</sub> O <sub>3</sub> , SiO <sub>2</sub> < 1 %                                                                                                                           | <a href="http://www.degudent.com/Communication_and_Service/Download/Cercon/Download_Cercon.php">http://www.degudent.com/Communication_and_Service/Download/Cercon/Download_Cercon.php</a>                                                             |
| <b>CopraSmile</b>             | Dent To Be, Sweden                   | 3 mol% Y-TZP: ZrO <sub>2</sub> > 90 w; Y <sub>2</sub> O <sub>3</sub> 0.358-9.32, Al <sub>2</sub> O <sub>3</sub> 0.046-0.054, Fe <sub>2</sub> O <sub>3</sub> 0.015-0.142, Er <sub>2</sub> O <sub>3</sub> 0-0.626, Co <sub>3</sub> O <sub>4</sub> 0-0.009, other oxides 0-0.004 | <a href="http://www.white-peaks-dental.com/en/downloads/e_Copran_Instructions-for-use_Zri_Supreme_Smile_Hyperion_Rev_14">http://www.white-peaks-dental.com/en/downloads/e_Copran_Instructions-for-use_Zri_Supreme_Smile_Hyperion_Rev_14</a>           |
| <b>Crystal Zirconia</b>       | Diamond, Crystal Zirconia, DLMS, USA | 3 mol% Y-TZP: 5%Y <sub>2</sub> O <sub>3</sub> , 3% HfO <sub>2</sub> , <1% Al <sub>2</sub> O <sub>3</sub>                                                                                                                                                                      | Reference [148]                                                                                                                                                                                                                                       |
| <b>DD Bio ZX<sup>2</sup></b>  | Dental Direkt GmbH, Germany          | 3 mol% Y-TZP: ZrO <sub>2</sub> + HfO <sub>2</sub> + Y <sub>2</sub> O <sub>3</sub> > 99; Al <sub>2</sub> O <sub>3</sub> < 0.5; other oxides ≤ 1                                                                                                                                | Reference [146 ]                                                                                                                                                                                                                                      |
| <b>DD Cube X<sup>2</sup></b>  | Dental Direkt GmbH, Germany          | 10% wt% Y-TZP: ZrO <sub>2</sub> + HfO <sub>2</sub> > 99 wt%; Al <sub>2</sub> O <sub>3</sub> < 0.01 wt%; other oxides ≤ 1. wt%                                                                                                                                                 | <a href="https://www.dentaldirekt.de/en/products/materials/zirconium-dioxide/white-zirconium-dioxide/dd-cubex2r">https://www.dentaldirekt.de/en/products/materials/zirconium-dioxide/white-zirconium-dioxide/dd-cubex2r</a>                           |
| <b>DentGallop</b>             | DentGallop, USA                      | 4Y-TZP (ZrO <sub>2</sub> +HfO <sub>2</sub> +Y <sub>2</sub> O <sub>3</sub> > 99%, Y <sub>2</sub> O <sub>3</sub> >4 mol %)                                                                                                                                                      | Reference [98]                                                                                                                                                                                                                                        |
| <b>Diazir</b>                 | Ivoclar Vivadent, Lichtenstein       | 3mol% Y-TZP (No other details could be found)                                                                                                                                                                                                                                 | Reference [149]                                                                                                                                                                                                                                       |
| <b>Everest ZH</b>             | KaVo Dental GmbH, Germany            | 3mol% Y-TZP (No other details could be found)                                                                                                                                                                                                                                 | Reference [77]                                                                                                                                                                                                                                        |
| <b>ICE Zirkon</b>             | Zirkonzahn, Italy                    | 3mol% Y-TZP: ZrO <sub>2</sub> , Y <sub>2</sub> O <sub>3</sub> 4–6%, Al <sub>2</sub> O <sub>3</sub> < 1% SiO <sub>2</sub> < 0.02%, Fe <sub>2</sub> O <sub>3</sub> < 0.01% Na <sub>2</sub> O < 0.04%                                                                            | Reference [82]                                                                                                                                                                                                                                        |
| <b>ICE Zirkon Translucent</b> | Zirkonzahn, Italy                    | 3 mol% Y-TZP: 4%-6% Y <sub>2</sub> O <sub>3</sub> , <1% Al <sub>2</sub> O <sub>3</sub> , < 0.02% SiO <sub>2</sub> , < 0.01% Fe <sub>2</sub> O <sub>3</sub> , < 0.04% Na <sub>2</sub> O                                                                                        | References [82]                                                                                                                                                                                                                                       |
| <b>Incoris TZI</b>            | Dentsply Sirona, USA                 | 3 mol% Y-TZP: ZrO <sub>2</sub> +HfO <sub>2</sub> +Y <sub>2</sub> O <sub>3</sub> ≥ 99.0%, Y <sub>2</sub> O <sub>3</sub> > 4.5 - ≤ 6.0%, HfO <sub>2</sub> ≤ 5%, Al <sub>2</sub> O <sub>3</sub> ≤ 0.04%, Other oxides ≤ 1.1%                                                     | Reference [45]                                                                                                                                                                                                                                        |
| <b>Katana HT</b>              | KURARAY CO, LTD, Japan               | ~5.5 mol% Y-TZP: Al <sub>2</sub> O <sub>3</sub> =0.13 (0.10), Y <sub>2</sub> O <sub>3</sub> =10.91 (0.73), ZrO <sub>2</sub> =86.50 (0.85), HfO <sub>2</sub> =2.46 (0.26)                                                                                                      | <a href="https://www.bego.com/fileadmin/user_downloads/Mediathek/Medical/en_Keramik/KATANA_Zirconia/me_800369_0000_pp_en.pdf">https://www.bego.com/fileadmin/user_downloads/Mediathek/Medical/en_Keramik/KATANA_Zirconia/me_800369_0000_pp_en.pdf</a> |



|                                        |                                         |                                                                                                                                                                                                                                              |                                                                                                                                                                                                                                                           |
|----------------------------------------|-----------------------------------------|----------------------------------------------------------------------------------------------------------------------------------------------------------------------------------------------------------------------------------------------|-----------------------------------------------------------------------------------------------------------------------------------------------------------------------------------------------------------------------------------------------------------|
| <b>Katana ML</b>                       | KURARAY CO, LTD, Japan                  | ~5.5 mol% Y-TZP: Al <sub>2</sub> O <sub>3</sub> =0.16 (0.10), Y <sub>2</sub> O <sub>3</sub> =10.95 (0.29), ZrO <sub>2</sub> =86.21 (0.59), HfO <sub>2</sub> =2.41 (0.27)                                                                     | <a href="https://www.bego.com/fileadmin/user_downloads/Mediathek/Medical/en_Keramik/KATANA_Zirconia/me_800369_0000_pp_en.pdf">https://www.bego.com/fileadmin/user_downloads/Mediathek/Medical/en_Keramik/KATANA_Zirconia/me_800369_0000_pp_en.pdf</a>     |
| <b>Katana UTML</b>                     | KURARAY CO, LTD, Japan                  | 87–92% ZrO <sub>2</sub> + HfO <sub>2</sub> , 8–11% Y <sub>2</sub> O <sub>3</sub> , other oxides 0-2%                                                                                                                                         | <a href="https://www.bego.com/fileadmin/user_downloads/Mediathek/Medical/en_Keramik/KATANA_Zirconia/me_800369_0000_pp_en.pdf">https://www.bego.com/fileadmin/user_downloads/Mediathek/Medical/en_Keramik/KATANA_Zirconia/me_800369_0000_pp_en.pdf</a>     |
| <b>Lava, Lava Frame</b>                | 3M ESPE, USA                            | 3mol% Y-TZP (No other details could be found)                                                                                                                                                                                                | <a href="http://www.lava-elite.com/lava-classic-crowns-bridges.shtml">http://www.lava-elite.com/lava-classic-crowns-bridges.shtml</a>                                                                                                                     |
| <b>Lava Multi</b>                      | 3M ESPE, USA                            | 3mol% Y-TZP (No other details could be found)                                                                                                                                                                                                | <a href="http://www.lava-elite.com/lava-classic-crowns-bridges.shtml">http://www.lava-elite.com/lava-classic-crowns-bridges.shtml</a>                                                                                                                     |
| <b>Lava Plus al</b>                    | 3M ESPE, USA                            | 3mol% Y-TZP (No other details could be found) (lower Alumina content of 0.1% compared to Lava Frame)                                                                                                                                         | <a href="http://www.lava-elite.com/lava-classic-crowns-bridges.shtml">http://www.lava-elite.com/lava-classic-crowns-bridges.shtml</a>                                                                                                                     |
| <b>Novazir Max T</b>                   | Novadent, Germany                       | Y-TZP: ZrO <sub>2</sub> + HfO <sub>2</sub> 86.3% ~ 94.2% , Y <sub>2</sub> O <sub>3</sub> 5.8% ~ 9.7%, Fe <sub>2</sub> O <sub>3</sub> <0.5% , Al <sub>2</sub> O <sub>3</sub> ≤0.5%, Er <sub>2</sub> O <sub>3</sub> : <2% , Other oxides<0.5%  | <a href="https://www.novadent.de/tl_files/novadent/Produkte/NOVAZIR/07062016_NOVAZIR_MaxT_Instructionforuse_englisch_Rev02.pdf">https://www.novadent.de/tl_files/novadent/Produkte/NOVAZIR/07062016_NOVAZIR_MaxT_Instructionforuse_englisch_Rev02.pdf</a> |
| <b>Prettau</b>                         | Zirkonzahn, Italy                       | 3mol% Y-TZP: ZrO <sub>2</sub> = main component, Y <sub>2</sub> O <sub>3</sub> = 4 – 6 % , Al <sub>2</sub> O <sub>3</sub> < 1 % , SiO <sub>2</sub> < 0.02 % , Fe <sub>2</sub> O <sub>3</sub> < 0.01 % , Na <sub>2</sub> O< 0.04 %             | Reference [150]                                                                                                                                                                                                                                           |
| <b>Priti multidisc ZrO<sub>2</sub></b> | Pritidenta, Germany                     | ~5mol% Y-TZP: ZrO <sub>2</sub> /HfO <sub>2</sub> 89.89 - 90.7 % , Y <sub>2</sub> O <sub>3</sub> 8.55 - 10.11 % , Al <sub>2</sub> O <sub>3</sub> < 0.2 % , Other oxides <0.7%                                                                 | <a href="https://pritudenta.com/en/products/cadcam-materials/pritirmultidisc-zro2-monochrome-extra-translucent/">https://pritudenta.com/en/products/cadcam-materials/pritirmultidisc-zro2-monochrome-extra-translucent/</a>                               |
| <b>Rainbow</b>                         | Genoss, Suwon, Korea                    | 3mol% Y-TZP: ZrO <sub>2</sub> , Y <sub>2</sub> O <sub>3</sub> 4 – 6%, HfO <sub>2</sub> ≤5%, Al <sub>2</sub> O <sub>3</sub> ≤1%, Other oxides                                                                                                 | Reference [55]                                                                                                                                                                                                                                            |
| <b>Rainbow High Shine</b>              | Genoss, Suwon, Korea                    | ~5.5mol% Y-TZP: ZrO <sub>2</sub> , Y <sub>2</sub> O <sub>3</sub> 9–11%, HfO <sub>2</sub> 5%, Al <sub>2</sub> O <sub>3</sub> 1%, Other oxides                                                                                                 | Reference [55]                                                                                                                                                                                                                                            |
| <b>StarCeram Z-Smile</b>               | H.C.Starck, Vietnam                     | ~5mol% Y-TZP: ZrO <sub>2</sub> /HfO <sub>2</sub> /Y <sub>2</sub> O <sub>3</sub> >99%, Y <sub>2</sub> O <sub>3</sub> 8.5-9.6%, HfO <sub>2</sub> <5%, Al <sub>2</sub> O <sub>3</sub> <0.1%, Other oxides <0.1%                                 | Reference[68]                                                                                                                                                                                                                                             |
| <b>VITA YZ-HT</b>                      | Vita Zahnfabrik, Bad Säckingen, Germany | 3mol% Y-TZP: ZrO <sub>2</sub> 90.4-94.5, + HfO <sub>2</sub> + Y <sub>2</sub> O <sub>3</sub> 4 -6, HfO <sub>2</sub> 1.5-2.5, Al <sub>2</sub> O <sub>3</sub> 0-0.3, Er <sub>2</sub> O <sub>3</sub> 0-0.5, Fe <sub>2</sub> O <sub>3</sub> 0-0.3 | VITA_10160_10160E_YZ_TWD_EN_V02_screen_en.pdf ( <a href="http://www.vita-zahnfabrik.com/en/">www.vita-zahnfabrik.com/en/</a> )                                                                                                                            |

|                                                                   |                                                |                                                                                                                                    |                                                                                                                                                                                                                                                                   |
|-------------------------------------------------------------------|------------------------------------------------|------------------------------------------------------------------------------------------------------------------------------------|-------------------------------------------------------------------------------------------------------------------------------------------------------------------------------------------------------------------------------------------------------------------|
| <b>Zenostar Zr, Zenostar T, Zenostar Sun, Zenostar Sun Chroma</b> | Wieland Dental+ Technik GmbH & Co. KG, Germany | 3mol% Y-TZP: $ZrO_2 + HfO_2 + Y_2O_3 > 99$ ; $4,5 < Y_2O_3 \leq 6$ ; $HfO_2 \leq 5$ ; $Al_2O_3 + \text{other oxides} \leq 1$       | Reference [17]                                                                                                                                                                                                                                                    |
| <b>Zeno Zr</b>                                                    | Wieland Dental+ Technik GmbH & Co. KG, Germany | 3mol% Y-TZP: ( $ZrO_2 + HfO_2$ ) 94%, ( $Y_2O_3$ ) 5%, ( $Al_2O_3$ ) <1%, other oxides <1%)                                        | Reference [151]                                                                                                                                                                                                                                                   |
| <b>ZirBlank</b>                                                   | Acucera, Korea                                 | 3mol% Y-TZP: $ZrO_2 \geq 94.20$ wt%, $Y_2O_3$ , $HfO_2 \leq 5.45$ wt%                                                              | Reference [94]                                                                                                                                                                                                                                                    |
| <b>ZirLuna</b>                                                    | ACF, Amberg, Germany                           | 3mol% Y-TZP (No other details could be found)                                                                                      | Reference [94]                                                                                                                                                                                                                                                    |
| <b>Zirtooth Fulluster</b>                                         | HASS, Gangneng, Korea                          | 3mol% Y-TZP: $ZrO_2 + HfO_2 + Y_2O_3 = 99.6$ , % $Y_2O_3 = 5.35$ %, $HfO_2 = 3$ %; $Al_2O_3 = 0.21$ %, other oxides =0.19%         | Reference [111]<br><a href="https://www.slideshare.net/hasscorp/hassbio">https://www.slideshare.net/hasscorp/hassbio</a>                                                                                                                                          |
| <b>Zolid fx Preshade</b>                                          | Amann Girschbach AG, Austria                   | $ZrO_2 + HfO_2 + Y_2O_3 \geq 99.0$ , $Y_2O_3$ 8,5 – 9,5, $HfO_2 \leq 5$ , $Al_2O_3 \leq 0.5$ , Other oxides $\leq 1$               | <a href="https://www.amanngirschbach.com/en/products/cadcam-material/ceramic/ceramill-zirconia/ceramill-zolid-fx-preshades/">https://www.amanngirschbach.com/en/products/cadcam-material/ceramic/ceramill-zirconia/ceramill-zolid-fx-preshades/</a>               |
| <b>Zerion</b>                                                     | Straumann, Switzerland                         | $ZrO_2 + HfO_2 + Y_2O_3 \geq 99.0$ %, $6 > Y_2O_3 > 4.5$ %, $HfO_2 \leq 5$ %, $0.5 > Al_2O_3 > 0.05$ %, other oxides $\leq 0.5$ %. | <a href="https://www.straumann.com/content/dam/media-center/straumann/en/documents/brochure/product-information/490.392-en_low.pdf">https://www.straumann.com/content/dam/media-center/straumann/en/documents/brochure/product-information/490.392-en_low.pdf</a> |
| <b>Zpex</b>                                                       | Tosoh Corporation, Tokyo, Japan                | 3mol% Y-TZP: 5.2% $Y_2O_3$ , 0.05% $Al_2O_3$                                                                                       | <a href="http://www.rbhltd.com/wp-content/uploads/2019/05/Tosoh-Zirconia-Brochure.pdf">http://www.rbhltd.com/wp-content/uploads/2019/05/Tosoh-Zirconia-Brochure.pdf</a>                                                                                           |
| <b>Zpex Smile</b>                                                 | Tosoh Corporation, Tokyo, Japan                | ~5mol% Y-TZP: 9.35% $Y_2O_3$ , 0.05% $Al_2O_3$                                                                                     | <a href="http://www.rbhltd.com/wp-content/uploads/2019/05/Tosoh-Zirconia-Brochure.pdf">http://www.rbhltd.com/wp-content/uploads/2019/05/Tosoh-Zirconia-Brochure.pdf</a>                                                                                           |
